# Supplementary material for: Short term effects of Municipal Solid Waste compost, Khat-Derived Biochar and Co-composted Biochar on Soil quality and Faba bean Yield and Protein content
Source: Research Square preprint supplement (doi:10.21203/rs.3.rs-424999/v1), 2021-04-27
Supplement: Supplementary file 1 [file 4ed8ce3f2282c54c9d59310d.docx]

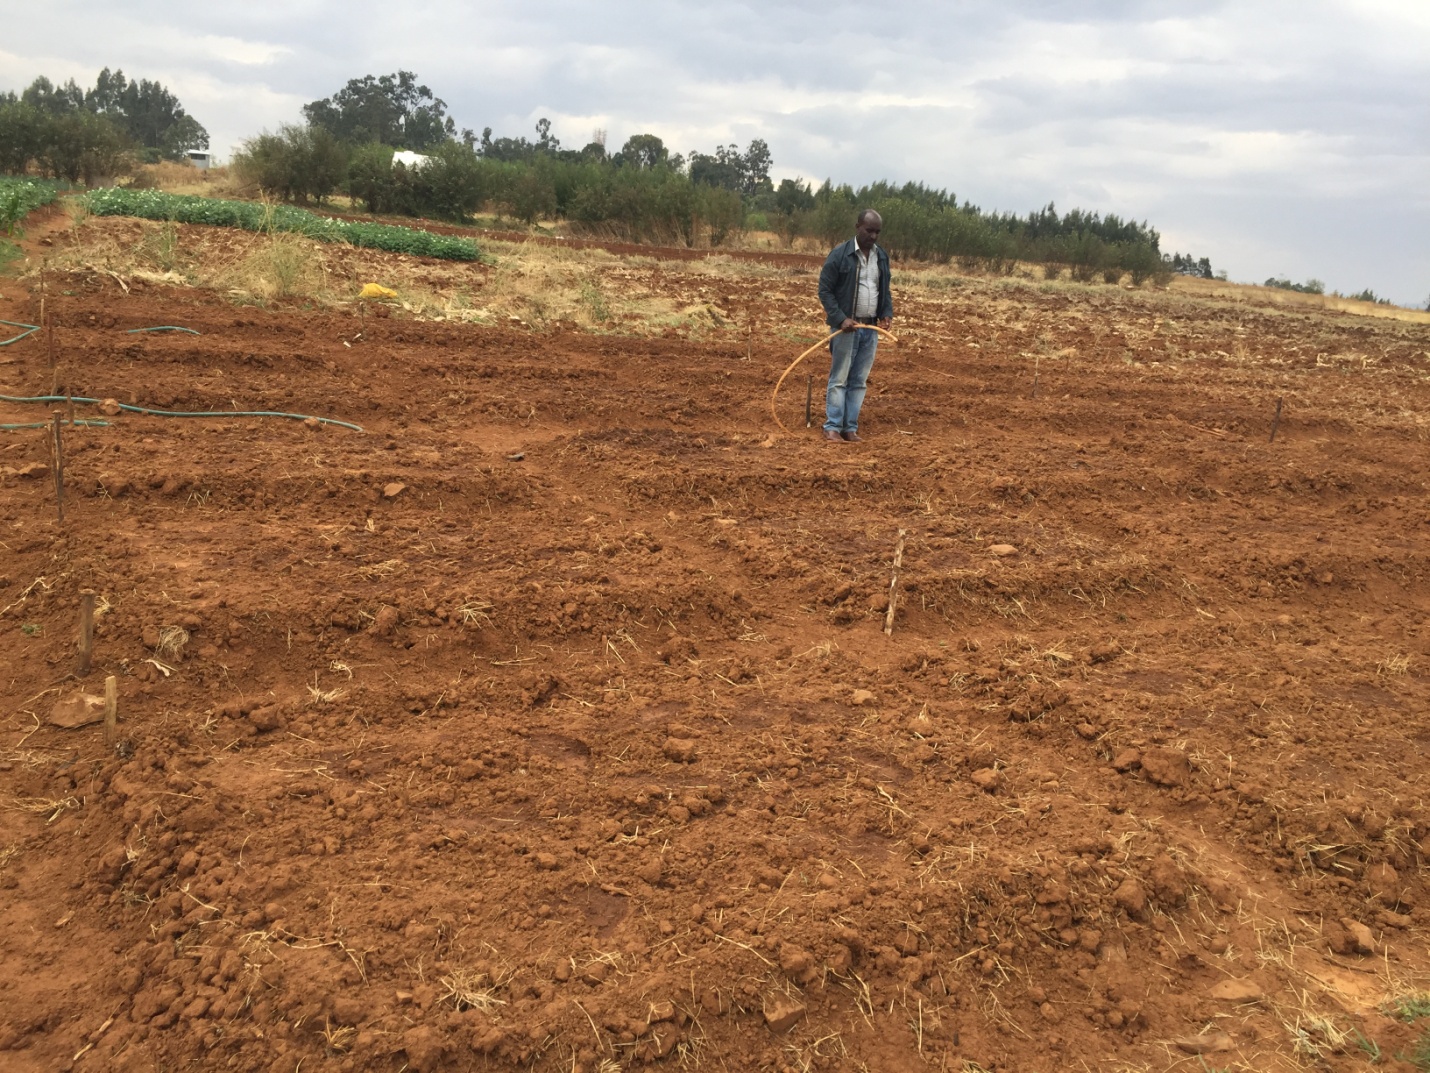
(a)

a


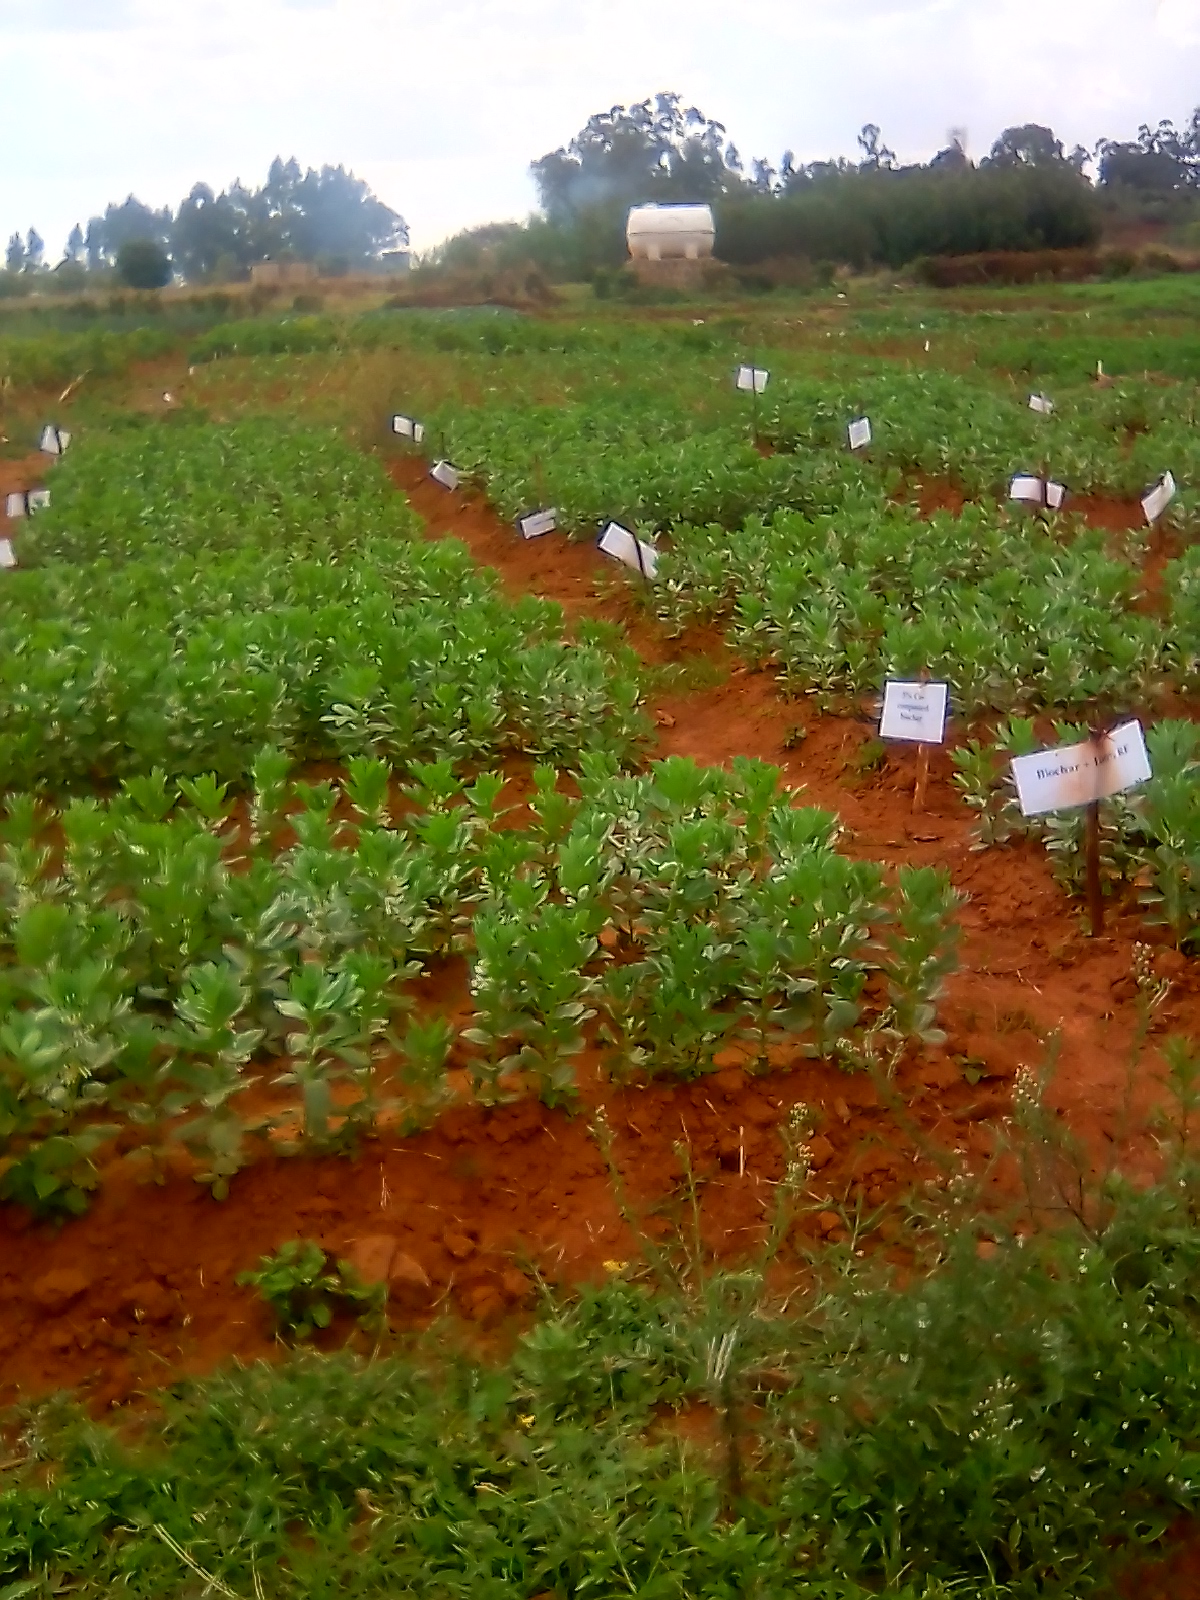
 (b)


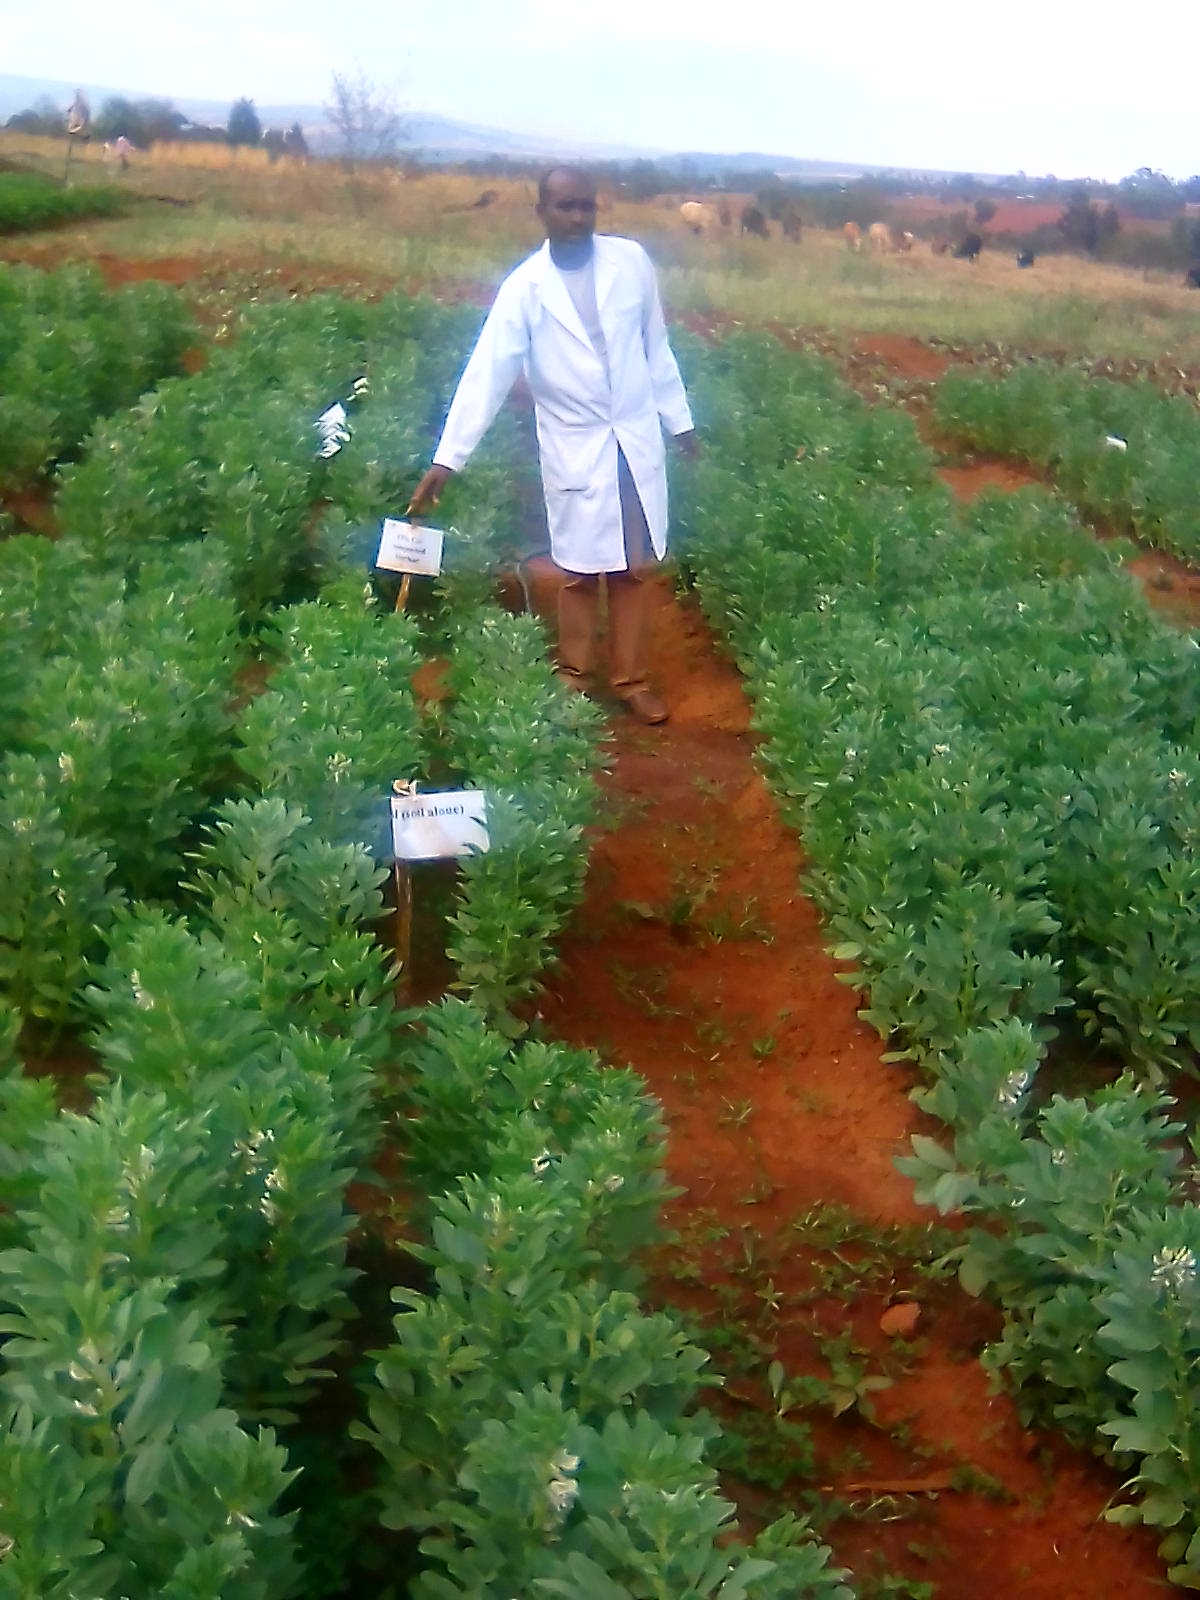
 (c)


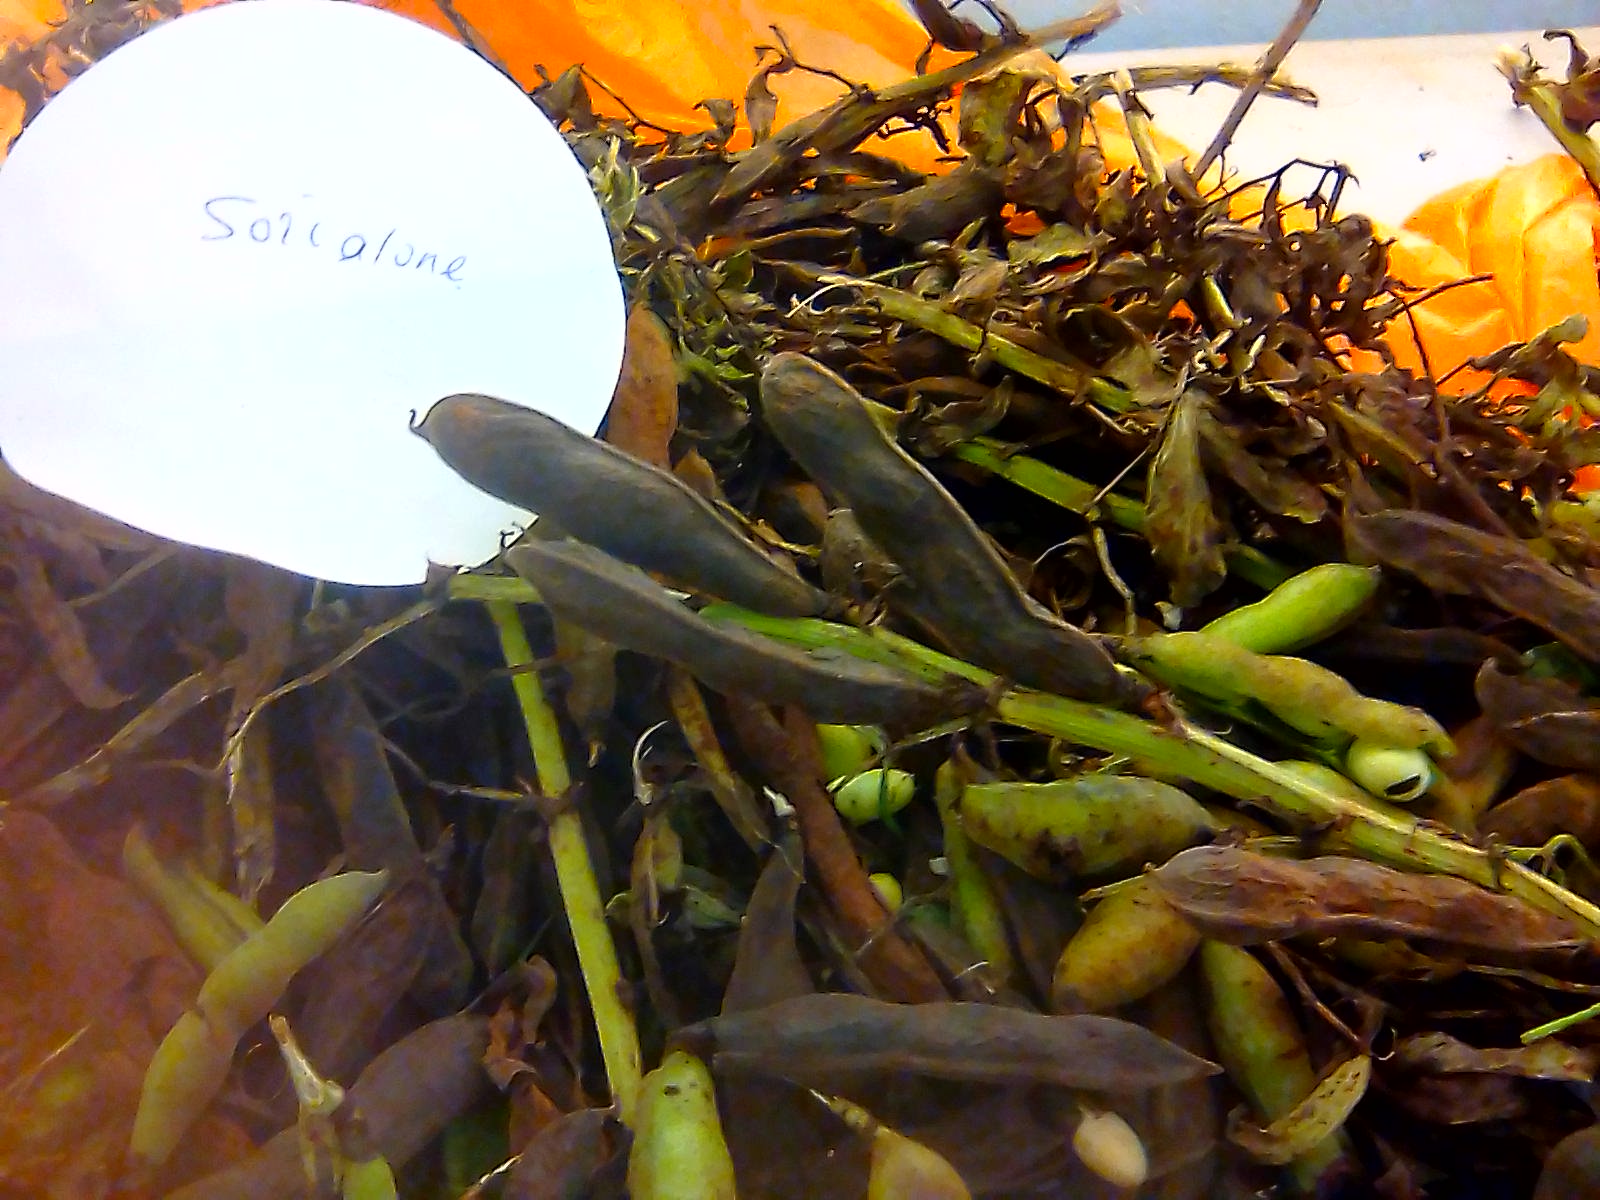
 (d)


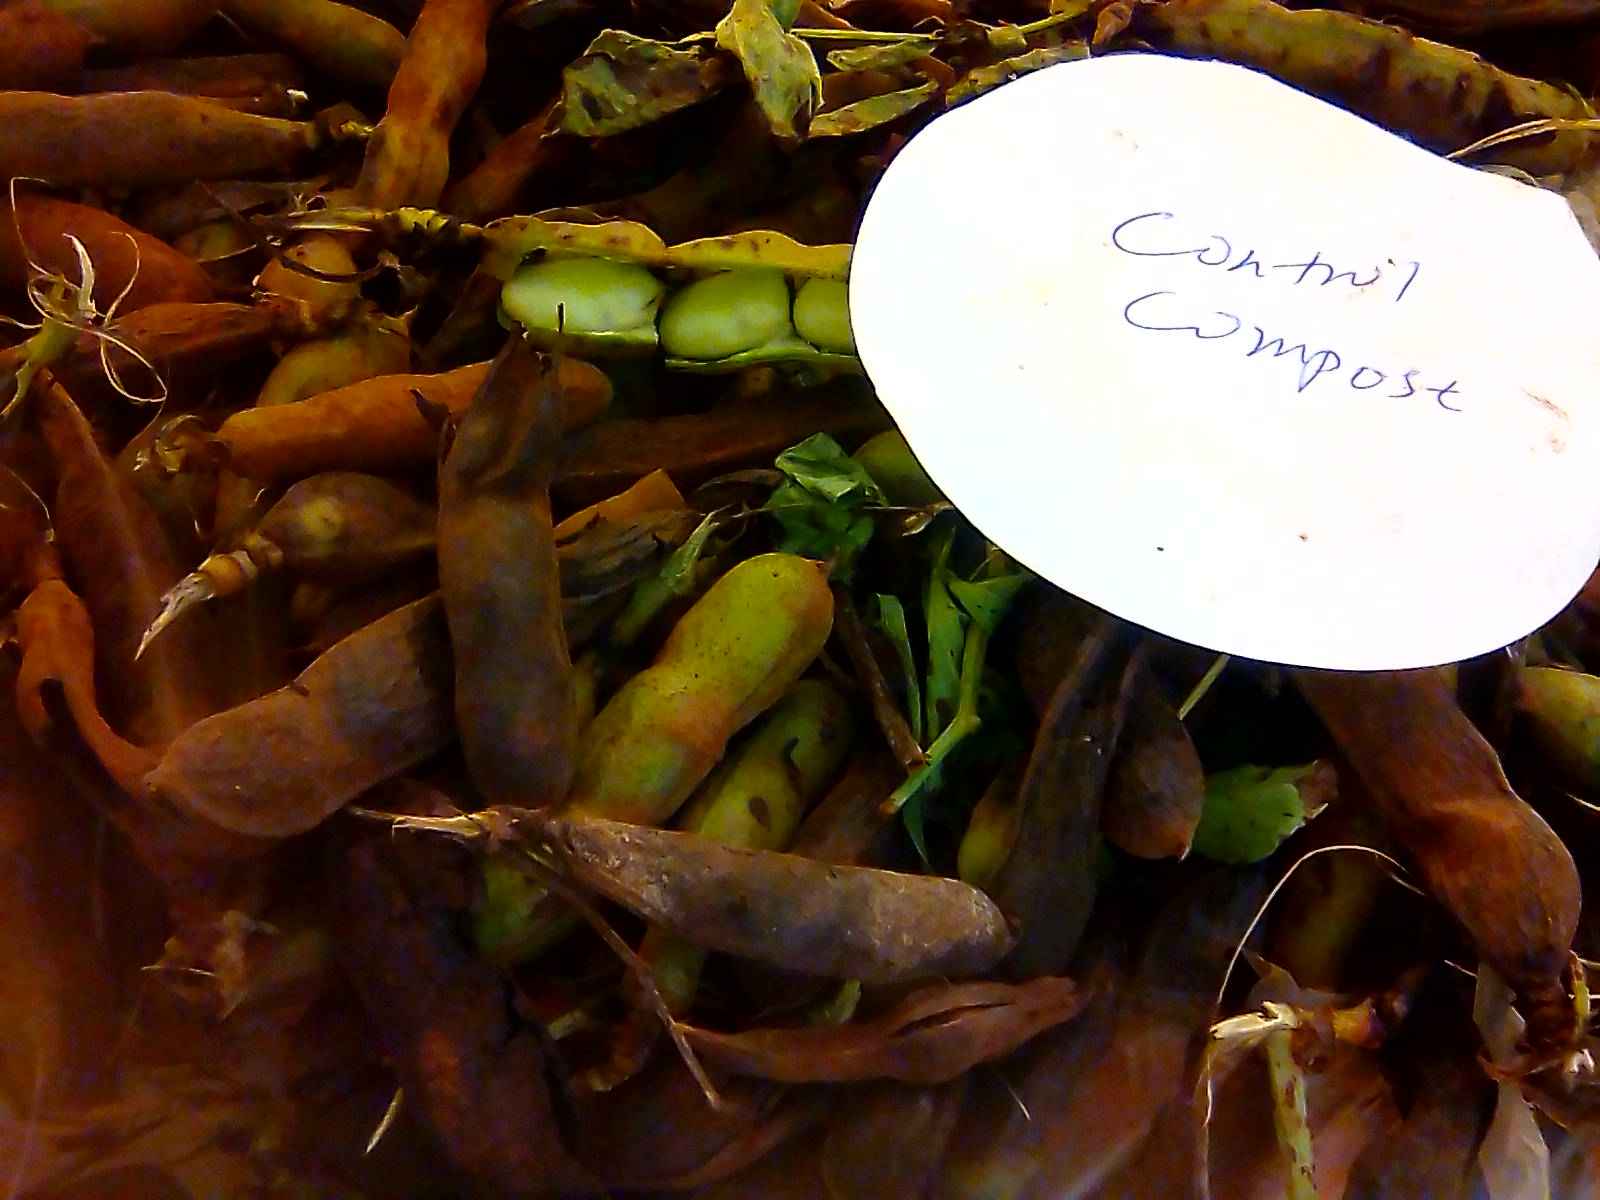
 (e )


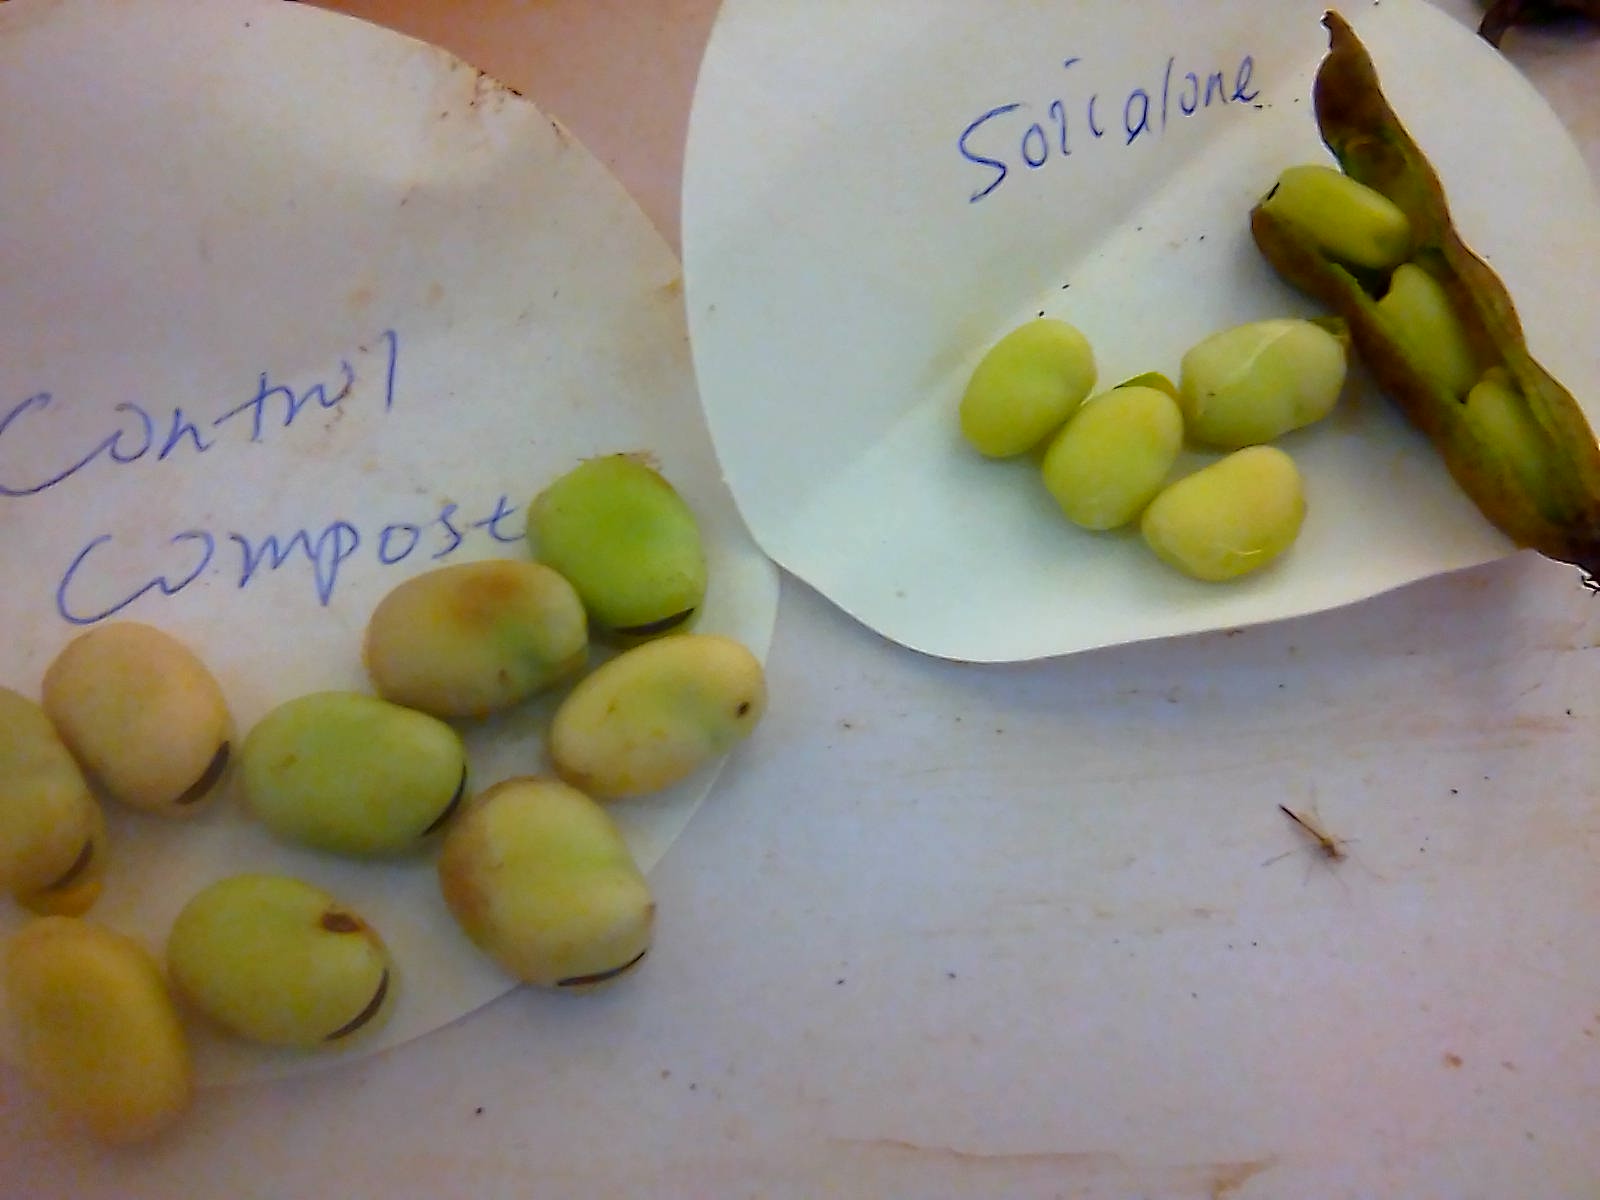
(f)

**Shot-term Effects of Khat-Derived Biochar, Compost and Co-composted Biochar from Municipal Solid Waste sources on Soil quality and Faba bean Yield and Protein content**
